# Supplementary material for: Impact of conditional cash transfer programmes on antenatal care service uptake in low and middle-income countries: a systematic review
Source: PubMed Central journal article supplement — BMJ Open. 2022 Nov 25;12(11):e064673. doi: 10.1136/bmjopen-2022-064673 (PMC9703316; doi:10.1136/bmjopen-2022-064673), 2022-11-25
Supplement: bmjopen-2022-064673supp001.pdf [file bmjopen-2022-064673supp001.pdf]

# Appendix

## Appendix A: Search strategy

|          |                 |
|----------|-----------------|
| Database | CENTRAL         |
| Results  | 339             |
| Date     | 21 January 2022 |

|     |                                                                                                                                                                                                  |       |  |
|-----|--------------------------------------------------------------------------------------------------------------------------------------------------------------------------------------------------|-------|--|
| #1  | Cash near/2 transfer*                                                                                                                                                                            | 380   |  |
| #2  | Cash near/2 payment*                                                                                                                                                                             | 60    |  |
| #3  | Voucher*                                                                                                                                                                                         | 853   |  |
| #4  | Cash near/2 assistance                                                                                                                                                                           | 19    |  |
| #5  | Financ* NEXT incentiv*                                                                                                                                                                           | 1276  |  |
| #6  | Mone* NEXT incentiv*                                                                                                                                                                             | 510   |  |
| #7  | Cash NEXT incentiv*                                                                                                                                                                              | 134   |  |
| #8  | Mone* NEXT transfer*                                                                                                                                                                             | 17    |  |
| #9  | Cash NEXT based NEXT intervention*                                                                                                                                                               | 4     |  |
| #10 | "Social insurance"                                                                                                                                                                               | 289   |  |
| #11 | "Community-based insurance"                                                                                                                                                                      | 5     |  |
| #12 | MeSH descriptor: [Social Security] explode all trees                                                                                                                                             | 46    |  |
| #13 | MeSH descriptor: [Community-Based Health Insurance] this term only                                                                                                                               | 2     |  |
| #14 | Antenat*                                                                                                                                                                                         | 5571  |  |
| #15 | Ante NEXT nat*                                                                                                                                                                                   | 94    |  |
| #16 | ANC                                                                                                                                                                                              | 2376  |  |
| #17 | Perinat*                                                                                                                                                                                         | 10524 |  |
| #18 | Peri NEXT nat*                                                                                                                                                                                   | 33    |  |
| #19 | Prenat*                                                                                                                                                                                          | 7888  |  |
| #20 | Pre NEXT nat*                                                                                                                                                                                    | 130   |  |
| #21 | Matern*                                                                                                                                                                                          | 29044 |  |
| #22 | "Primary care"                                                                                                                                                                                   | 23761 |  |
| #23 | Primary NEXT health*                                                                                                                                                                             | 8949  |  |
| #24 | Pregna*                                                                                                                                                                                          | 74636 |  |
| #25 | Antepartum                                                                                                                                                                                       | 771   |  |
| #26 | "Ante partum"                                                                                                                                                                                    | 39    |  |
| #27 | MeSH descriptor: [Perinatal Care] this term only                                                                                                                                                 | 181   |  |
| #28 | MeSH descriptor: [Prenatal Care] this term only                                                                                                                                                  | 1620  |  |
| #29 | MeSH descriptor: [Maternal-Child Health Services] this term only                                                                                                                                 | 47    |  |
| #30 | MeSH descriptor: [Pregnancy] this term only                                                                                                                                                      | 23343 |  |
| #31 | Developing NEXT countr*                                                                                                                                                                          | 4925  |  |
| #32 | Low NEXT income NEXT countr*                                                                                                                                                                     | 1396  |  |
| #33 | Middle NEXT income NEXT countr*                                                                                                                                                                  | 2995  |  |
| #34 | LMIC                                                                                                                                                                                             | 327   |  |
| #35 | MeSH descriptor: [Developing Countries] this term only                                                                                                                                           | 907   |  |
| #36 | "Eastern Europe" or "Pacific Islands" or "Indian Ocean Islands" or "West Indies" or Caribbean or "Atlantic Islands" or Africa or "South America" or "Latin America" or "Central America" or Asia | 21994 |  |

#37 Afghanistan or Albania or Algeria or "American Samoa" or Angola or Argentina or "Argentine Republic" or Armenia or Azerbaijan or Bangladesh or Belarus or Byelorussia or Belorussia or Belize or Benin or Bhutan or Bolivia or Bosnia or Herzegovina or Hercegovina or Botswana or Brazil or Bulgaria or Burkina Faso or Burundi or "Cabo Verde" or "Cape Verde" or Cambodia or Cameroon or "Central African Republic" or Chad or China or Colombia or Comoro\* or Comores or Congo or "Costa Rica" or "Ivory Coast" or "Cote d'Ivoire" or Cuba or Djibouti or Dominica or "Dominican Republic" or Ecuador or Egypt or "El Salvador" or "Equatorial Guinea" or Eritrea or Eswatini or Swaziland or Ethiopia or Fiji or Gabon or Gambia or Georgia or Ghana or Grenada or Guatemala or Guinea or "Guinea-Bissau" or Guyana or Haiti or Honduras or India or Indonesia or Iran or Iraq or Jamaica or Jordan or Kazakhstan or Kenya or Kiribati or Korea or Kosovo or Kirghiz\* or Kyrgyz\* or Laos or "Lao PDR" or Lebanon or Lesotho or Liberia or Libya or Madagascar or Malawi or Malay\* or Maldives or Mali or "Marshall Islands" or Mauritania or Mauritius or Mexico or Micronesia or Moldova or Mongolia or Montenegro or Morocco or Mozambique or Myanmar or Burma or Namibia or Nepal or Nicaragua or Niger or Nigeria or Macedonia or Pakistan or Panama or "Papua New Guinea" or Paraguay or Peru or Philippines or Philippines or Romania or Russia or Rwanda or Ruanda or Samoa or "Sao Tome" or Principe or Senegal or Serbia or "Sierra Leone" or "Solomon Islands" or Somalia or "South Africa" or "South Sudan" or "Sri Lanka" or Lucia or Vincent or Grenadines or Sudan or Surinam\* or Syria or Tajik\* or Tadjik\* or Tadhik\* or Tanzania or Thailand or Timor\* or Togo or Tonga or Tunisia or Turkey or Turkmen\* or Tuvalu or Uganda or Ukraine or Uzbek\* or Vanuatu or Vietnam or Palestine or "West Bank" or Gaza or Yemen or Zambia or Zimbabwe 240376

|     |                                                                    |      |
|-----|--------------------------------------------------------------------|------|
| #38 | MeSH descriptor: [Afghanistan] this term only                      | 51   |
| #39 | MeSH descriptor: [Albania] this term only                          | 5    |
| #40 | MeSH descriptor: [Algeria] this term only                          | 13   |
| #41 | MeSH descriptor: [American Samoa] this term only                   | 6    |
| #42 | MeSH descriptor: [Angola] this term only                           | 12   |
| #43 | MeSH descriptor: [Argentina] this term only                        | 201  |
| #44 | MeSH descriptor: [Armenia] this term only                          | 8    |
| #45 | MeSH descriptor: [Azerbaijan] this term only                       | 7    |
| #46 | MeSH descriptor: [Bangladesh] this term only                       | 704  |
| #47 | MeSH descriptor: [Republic of Belarus] this term only              | 29   |
| #48 | MeSH descriptor: [Belize] this term only                           | 10   |
| #49 | MeSH descriptor: [Benin] this term only                            | 51   |
| #50 | MeSH descriptor: [Bhutan] this term only                           | 2    |
| #51 | MeSH descriptor: [Bolivia] this term only                          | 37   |
| #52 | MeSH descriptor: [Bosnia and Herzegovina] this term only           | 15   |
| #53 | MeSH descriptor: [Botswana] this term only                         | 66   |
| #54 | MeSH descriptor: [Brazil] this term only                           | 1671 |
| #55 | MeSH descriptor: [Bulgaria] this term only                         | 37   |
| #56 | MeSH descriptor: [Burkina Faso] this term only                     | 194  |
| #57 | MeSH descriptor: [Burundi] this term only                          | 18   |
| #58 | MeSH descriptor: [Cabo Verde] this term only                       | 0    |
| #59 | MeSH descriptor: [Cambodia] this term only                         | 123  |
| #60 | MeSH descriptor: [Cameroon] this term only                         | 106  |
| #61 | MeSH descriptor: [Central African Republic] this term only         | 12   |
| #62 | MeSH descriptor: [Chad] this term only                             | 5    |
| #63 | MeSH descriptor: [China] this term only                            | 4671 |
| #64 | MeSH descriptor: [Colombia] this term only                         | 174  |
| #65 | MeSH descriptor: [Comoros] this term only                          | 1    |
| #66 | MeSH descriptor: [Congo] this term only                            | 15   |
| #67 | MeSH descriptor: [Democratic Republic of the Congo] this term only | 107  |
| #68 | MeSH descriptor: [Costa Rica] this term only                       | 42   |
| #69 | MeSH descriptor: [Cote d'Ivoire] this term only                    | 102  |
| #70 | MeSH descriptor: [Cuba] this term only                             | 60   |
| #71 | MeSH descriptor: [Djibouti] this term only                         | 2    |
| #72 | MeSH descriptor: [Dominica] this term only                         | 0    |
| #73 | MeSH descriptor: [Dominican Republic] this term only               | 38   |
| #74 | MeSH descriptor: [Ecuador] this term only                          | 77   |
| #75 | MeSH descriptor: [Egypt] this term only                            | 453  |

|      |                                                                         |      |
|------|-------------------------------------------------------------------------|------|
| #76  | MeSH descriptor: [El Salvador] this term only                           | 8    |
| #77  | MeSH descriptor: [Equatorial Guinea] this term only                     | 5    |
| #78  | MeSH descriptor: [Eritrea] this term only                               | 1    |
| #79  | MeSH descriptor: [Eswatini] this term only                              | 22   |
| #80  | MeSH descriptor: [Ethiopia] this term only                              | 261  |
| #81  | MeSH descriptor: [Fiji] this term only                                  | 14   |
| #82  | MeSH descriptor: [Gabon] this term only                                 | 49   |
| #83  | MeSH descriptor: [Gambia] this term only                                | 243  |
| #84  | MeSH descriptor: [Georgia (Republic)] this term only                    | 18   |
| #85  | MeSH descriptor: [Ghana] this term only                                 | 334  |
| #86  | MeSH descriptor: [Grenada] this term only                               | 1    |
| #87  | MeSH descriptor: [Guatemala] this term only                             | 135  |
| #88  | MeSH descriptor: [Guinea] this term only                                | 8    |
| #89  | MeSH descriptor: [Guinea-Bissau] this term only                         | 101  |
| #90  | MeSH descriptor: [Guyana] this term only                                | 3    |
| #91  | MeSH descriptor: [Haiti] this term only                                 | 65   |
| #92  | MeSH descriptor: [Honduras] this term only                              | 40   |
| #93  | MeSH descriptor: [India] this term only                                 | 2343 |
| #94  | MeSH descriptor: [Indonesia] this term only                             | 371  |
| #95  | MeSH descriptor: [Iran] this term only                                  | 1632 |
| #96  | MeSH descriptor: [Iraq] this term only                                  | 54   |
| #97  | MeSH descriptor: [Jamaica] this term only                               | 67   |
| #98  | MeSH descriptor: [Jordan] this term only                                | 93   |
| #99  | MeSH descriptor: [Kazakhstan] this term only                            | 16   |
| #100 | MeSH descriptor: [Kenya] this term only                                 | 825  |
| #101 | MeSH descriptor: [Micronesia] this term only                            | 10   |
| #102 | MeSH descriptor: [Democratic People's Republic of Korea] this term only | 4    |
| #103 | MeSH descriptor: [Kosovo] this term only                                | 3    |
| #104 | MeSH descriptor: [Kyrgyzstan] this term only                            | 6    |
| #105 | MeSH descriptor: [Laos] this term only                                  | 39   |
| #106 | MeSH descriptor: [Lebanon] this term only                               | 74   |
| #107 | MeSH descriptor: [Lesotho] this term only                               | 14   |
| #108 | MeSH descriptor: [Liberia] this term only                               | 24   |
| #109 | MeSH descriptor: [Libya] this term only                                 | 6    |
| #110 | MeSH descriptor: [Madagascar] this term only                            | 39   |
| #111 | MeSH descriptor: [Malawi] this term only                                | 424  |
| #112 | MeSH descriptor: [Malaysia] this term only                              | 316  |
| #113 | MeSH descriptor: [Mali] this term only                                  | 113  |
| #114 | MeSH descriptor: [Mauritania] this term only                            | 4    |
| #115 | MeSH descriptor: [Mauritius] this term only                             | 3    |
| #116 | MeSH descriptor: [Mexico] this term only                                | 669  |
| #117 | MeSH descriptor: [Moldova] this term only                               | 6    |
| #118 | MeSH descriptor: [Mongolia] this term only                              | 22   |
| #119 | MeSH descriptor: [Montenegro] this term only                            | 2    |

|      |                                                                    |      |      |
|------|--------------------------------------------------------------------|------|------|
| #120 | MeSH descriptor: [Morocco] this term only                          | 37   |      |
| #121 | MeSH descriptor: [Mozambique] this term only                       |      | 94   |
| #122 | MeSH descriptor: [Myanmar] this term only                          | 78   |      |
| #123 | MeSH descriptor: [Namibia] this term only                          | 13   |      |
| #124 | MeSH descriptor: [Nepal] this term only                            | 327  |      |
| #125 | MeSH descriptor: [Nicaragua] this term only                        | 31   |      |
| #126 | MeSH descriptor: [Niger] this term only                            | 61   |      |
| #127 | MeSH descriptor: [Nigeria] this term only                          | 665  |      |
| #128 | MeSH descriptor: [Republic of North Macedonia] this term only      |      | 11   |
| #129 | MeSH descriptor: [Pakistan] this term only                         | 517  |      |
| #130 | MeSH descriptor: [Panama] this term only                           | 22   |      |
| #131 | MeSH descriptor: [Papua New Guinea] this term only                 |      | 66   |
| #132 | MeSH descriptor: [Paraguay] this term only                         | 5    |      |
| #133 | MeSH descriptor: [Peru] this term only                             | 215  |      |
| #134 | MeSH descriptor: [Philippines] this term only                      |      | 186  |
| #135 | MeSH descriptor: [Romania] this term only                          | 111  |      |
| #136 | MeSH descriptor: [Russia] this term only                           | 325  |      |
| #137 | MeSH descriptor: [Rwanda] this term only                           | 85   |      |
| #138 | MeSH descriptor: [Samoa] this term only                            | 2    |      |
| #139 | MeSH descriptor: [Sao Tome and Principe] this term only            | 0    |      |
| #140 | MeSH descriptor: [Senegal] this term only                          | 101  |      |
| #141 | MeSH descriptor: [Serbia] this term only                           | 51   |      |
| #142 | MeSH descriptor: [Sierra Leone] this term only                     |      | 41   |
| #143 | MeSH descriptor: [Melanesia] this term only                        | 5    |      |
| #144 | MeSH descriptor: [Somalia] this term only                          | 22   |      |
| #145 | MeSH descriptor: [South Africa] this term only                     |      | 1216 |
| #146 | MeSH descriptor: [South Sudan] this term only                      |      | 1    |
| #147 | MeSH descriptor: [Sri Lanka] this term only                        | 123  |      |
| #148 | MeSH descriptor: [Saint Lucia] this term only                      |      | 0    |
| #149 | MeSH descriptor: [Saint Vincent and the Grenadines] this term only |      | 0    |
| #150 | MeSH descriptor: [Sudan] this term only                            | 85   |      |
| #151 | MeSH descriptor: [Suriname] this term only                         | 17   |      |
| #152 | MeSH descriptor: [Syria] this term only                            | 40   |      |
| #153 | MeSH descriptor: [Tajikistan] this term only                       | 3    |      |
| #154 | MeSH descriptor: [Tanzania] this term only                         | 632  |      |
| #155 | MeSH descriptor: [Thailand] this term only                         | 1133 |      |
| #156 | MeSH descriptor: [Timor-Leste] this term only                      |      | 4    |
| #157 | MeSH descriptor: [Togo] this term only                             | 15   |      |
| #158 | MeSH descriptor: [Tonga] this term only                            | 1    |      |
| #159 | MeSH descriptor: [Tunisia] this term only                          | 63   |      |
| #160 | MeSH descriptor: [Turkey] this term only                           | 914  |      |
| #161 | MeSH descriptor: [Turkmenistan] this term only                     |      | 1    |
| #162 | MeSH descriptor: [Uganda] this term only                           | 789  |      |
| #163 | MeSH descriptor: [Ukraine] this term only                          | 51   |      |

|      |                                                                                                                                                                                                                                                                                                                                                                                                                                                                                                                                                                                                                                                                                                                                                                                                                                                                                                                                                                                                                                                                                                                                                              |        |
|------|--------------------------------------------------------------------------------------------------------------------------------------------------------------------------------------------------------------------------------------------------------------------------------------------------------------------------------------------------------------------------------------------------------------------------------------------------------------------------------------------------------------------------------------------------------------------------------------------------------------------------------------------------------------------------------------------------------------------------------------------------------------------------------------------------------------------------------------------------------------------------------------------------------------------------------------------------------------------------------------------------------------------------------------------------------------------------------------------------------------------------------------------------------------|--------|
| #164 | MeSH descriptor: [Uzbekistan] this term only                                                                                                                                                                                                                                                                                                                                                                                                                                                                                                                                                                                                                                                                                                                                                                                                                                                                                                                                                                                                                                                                                                                 | 11     |
| #165 | MeSH descriptor: [Vanuatu] this term only                                                                                                                                                                                                                                                                                                                                                                                                                                                                                                                                                                                                                                                                                                                                                                                                                                                                                                                                                                                                                                                                                                                    | 3      |
| #166 | MeSH descriptor: [Vietnam] this term only                                                                                                                                                                                                                                                                                                                                                                                                                                                                                                                                                                                                                                                                                                                                                                                                                                                                                                                                                                                                                                                                                                                    | 364    |
| #167 | MeSH descriptor: [Yemen] this term only                                                                                                                                                                                                                                                                                                                                                                                                                                                                                                                                                                                                                                                                                                                                                                                                                                                                                                                                                                                                                                                                                                                      | 6      |
| #168 | MeSH descriptor: [Zambia] this term only                                                                                                                                                                                                                                                                                                                                                                                                                                                                                                                                                                                                                                                                                                                                                                                                                                                                                                                                                                                                                                                                                                                     | 311    |
| #169 | MeSH descriptor: [Zimbabwe] this term only                                                                                                                                                                                                                                                                                                                                                                                                                                                                                                                                                                                                                                                                                                                                                                                                                                                                                                                                                                                                                                                                                                                   | 231    |
| #170 | MeSH descriptor: [Europe, Eastern] this term only                                                                                                                                                                                                                                                                                                                                                                                                                                                                                                                                                                                                                                                                                                                                                                                                                                                                                                                                                                                                                                                                                                            | 17     |
| #171 | MeSH descriptor: [Pacific Islands] this term only                                                                                                                                                                                                                                                                                                                                                                                                                                                                                                                                                                                                                                                                                                                                                                                                                                                                                                                                                                                                                                                                                                            | 17     |
| #172 | MeSH descriptor: [Indian Ocean Islands] this term only                                                                                                                                                                                                                                                                                                                                                                                                                                                                                                                                                                                                                                                                                                                                                                                                                                                                                                                                                                                                                                                                                                       | 6      |
| #173 | MeSH descriptor: [Caribbean Region] this term only                                                                                                                                                                                                                                                                                                                                                                                                                                                                                                                                                                                                                                                                                                                                                                                                                                                                                                                                                                                                                                                                                                           | 19     |
| #174 | MeSH descriptor: [Atlantic Islands] this term only                                                                                                                                                                                                                                                                                                                                                                                                                                                                                                                                                                                                                                                                                                                                                                                                                                                                                                                                                                                                                                                                                                           | 2      |
| #175 | MeSH descriptor: [Africa] this term only                                                                                                                                                                                                                                                                                                                                                                                                                                                                                                                                                                                                                                                                                                                                                                                                                                                                                                                                                                                                                                                                                                                     | 203    |
| #176 | MeSH descriptor: [South America] this term only                                                                                                                                                                                                                                                                                                                                                                                                                                                                                                                                                                                                                                                                                                                                                                                                                                                                                                                                                                                                                                                                                                              | 89     |
| #177 | MeSH descriptor: [Central America] this term only                                                                                                                                                                                                                                                                                                                                                                                                                                                                                                                                                                                                                                                                                                                                                                                                                                                                                                                                                                                                                                                                                                            | 9      |
| #178 | MeSH descriptor: [Latin America] this term only                                                                                                                                                                                                                                                                                                                                                                                                                                                                                                                                                                                                                                                                                                                                                                                                                                                                                                                                                                                                                                                                                                              | 128    |
| #179 | MeSH descriptor: [Asia] this term only                                                                                                                                                                                                                                                                                                                                                                                                                                                                                                                                                                                                                                                                                                                                                                                                                                                                                                                                                                                                                                                                                                                       | 308    |
| #180 | #1 OR #2 OR #3 OR #4 OR #5 OR #6 OR #7 OR #8 OR #9 OR #10 OR #11 OR #12 OR #13                                                                                                                                                                                                                                                                                                                                                                                                                                                                                                                                                                                                                                                                                                                                                                                                                                                                                                                                                                                                                                                                               | 3214   |
| #181 | #14 OR #15 OR #16 OR #17 OR #18 OR #19 OR #20 OR #21 OR #22 OR #23 OR #24 OR #25 OR #26 OR #27 OR #28 OR #29 OR #30                                                                                                                                                                                                                                                                                                                                                                                                                                                                                                                                                                                                                                                                                                                                                                                                                                                                                                                                                                                                                                          | 116971 |
| #182 | #31 #32 OR #33 OR #34 OR #35 OR #36 OR #37 OR #38 OR #39 OR #40 OR #41 OR #42 OR #43 OR #44 OR #45 OR #46 OR #47 OR #48 OR #49 OR #50 OR #51 OR #52 OR #53 OR #54 OR #55 OR #56 OR #57 OR #58 OR #59 OR #60 OR #61 OR #62 OR #63 OR #64 OR #65 OR #66 OR #67 OR #68 OR #69 OR #70 OR #71 OR #72 OR #73 OR #74 OR #75 OR #76 OR #77 OR #78 OR #79 OR #80 OR #81 OR #82 OR #83 OR #84 OR #85 OR #86 OR #87 OR #88 OR #89 OR #90 OR #91 OR #92 OR #93 OR #94 OR #95 OR #96 OR #97 OR #98 OR #99 OR #100 OR #101 OR #102 OR #103 OR #104 OR #105 OR #106 OR #107 OR #108 OR #109 OR #110 OR #111 OR #112 OR #113 OR #114 OR #115 OR #116 OR #117 OR #118 OR #119 OR #120 OR #121 OR #122 OR #123 OR #124 OR #125 OR #126 OR #127 OR #128 OR #129 OR #130 OR #131 OR #132 OR #133 OR #134 OR #135 OR #136 OR #137 OR #138 OR #139 OR #140 OR #141 OR #142 OR #143 OR #144 OR #145 OR #146 OR #147 OR #148 OR #149 OR #150 OR #151 OR #152 OR #153 OR #154 OR #155 OR #156 OR #157 OR #158 OR #159 OR #160 OR #161 OR #162 OR #163 OR #164 OR #165 OR #166 OR #167 OR #168 OR #169 OR #170 OR #171 OR #172 OR #173 OR #174 OR #175 OR #176 OR #177 OR #178 OR #179 | 247425 |
| #183 | #180 AND #181 AND #182 in Cochrane Reviews, Trials, Clinical Answers, Editorials, Special Collections                                                                                                                                                                                                                                                                                                                                                                                                                                                                                                                                                                                                                                                                                                                                                                                                                                                                                                                                                                                                                                                        | 353    |

Note: removed 14 clinical answers, editorials and special collections before screening, so the total became 339.

|          |                 |
|----------|-----------------|
| Database | Embase (Ovid)   |
| Results  | 877             |
| Date     | 21 January 2022 |

- 1 (Cash adj3 transfer\*).mp. [mp=title, abstract, heading word, drug trade name, original title, device manufacturer, drug manufacturer, device trade name, keyword heading word, floating subheading word, candidate term word] (950)
- 2 (Cash adj3 payment\*).mp. [mp=title, abstract, heading word, drug trade name, original title, device manufacturer, drug manufacturer, device trade name, keyword heading word, floating subheading word, candidate term word] (247)
- 3 Voucher\*.mp. [mp=title, abstract, heading word, drug trade name, original title, device manufacturer, drug manufacturer, device trade name, keyword heading word, floating subheading word, candidate term word] (2737)
- 4 (Cash adj3 assistance).mp. [mp=title, abstract, heading word, drug trade name, original title, device manufacturer, drug manufacturer, device trade name, keyword heading word, floating subheading word, candidate term word] (157)
- 5 cash incentiv\*.mp. [mp=title, abstract, heading word, drug trade name, original title, device manufacturer, drug manufacturer, device trade name, keyword heading word, floating subheading word, candidate term word] (253)
- 6 Financ\* incentiv\*.mp. [mp=title, abstract, heading word, drug trade name, original title, device manufacturer, drug manufacturer, device trade name, keyword heading word, floating subheading word, candidate term word] (6406)
- 7 Mone\* incentiv\*.mp. [mp=title, abstract, heading word, drug trade name, original title, device manufacturer, drug manufacturer, device trade name, keyword heading word, floating subheading word, candidate term word] (1939)
- 8 Mone\* transfer\*.mp. [mp=title, abstract, heading word, drug trade name, original title, device manufacturer, drug manufacturer, device trade name, keyword heading word, floating subheading word, candidate term word] (74)
- 9 Cash based intervention\*.mp. [mp=title, abstract, heading word, drug trade name, original title, device manufacturer, drug manufacturer, device trade name, keyword heading word, floating subheading word, candidate term word] (9)
- 10 exp social insurance/ (3663)
- 11 social insurance.mp. (5288)
- 12 Community-based insurance.mp. (30)

- 13 antenat\*.mp. (61671)
- 14 ante nat\*.mp. (1122)
- 15 ANC.mp. [mp=title, abstract, heading word, drug trade name, original title, device manufacturer, drug manufacturer, device trade name, keyword heading word, floating subheading word, candidate term word] (11049)
- 16 perinat\*.mp. [mp=title, abstract, heading word, drug trade name, original title, device manufacturer, drug manufacturer, device trade name, keyword heading word, floating subheading word, candidate term word] (163446)
- 17 peri nat\*.mp. [mp=title, abstract, heading word, drug trade name, original title, device manufacturer, drug manufacturer, device trade name, keyword heading word, floating subheading word, candidate term word] (452)
- 18 exp prenatal care/ (168798)
- 19 perinatal period/ (38633)
- 20 perinatal care/ (15070)
- 21 maternal care/ (19994)
- 22 prenatal\*.mp. [mp=title, abstract, heading word, drug trade name, original title, device manufacturer, drug manufacturer, device trade name, keyword heading word, floating subheading word, candidate term word] (281205)
- 23 pre nat\*.mp. [mp=title, abstract, heading word, drug trade name, original title, device manufacturer, drug manufacturer, device trade name, keyword heading word, floating subheading word, candidate term word] (2425)
- 24 matern\*.mp. (484686)
- 25 pregna\*.mp. (1170254)
- 26 exp pregnancy/ (849842)
- 27 exp primary health care/ (187395)
- 28 primary health\*.mp. [mp=title, abstract, heading word, drug trade name, original title, device manufacturer, drug manufacturer, device trade name, keyword heading word, floating subheading word, candidate term word] (93820)
- 29 primary care.mp. [mp=title, abstract, heading word, drug trade name, original title, device manufacturer, drug manufacturer, device trade name, keyword heading word, floating subheading word, candidate term word] (178603)
- 30 antepartum.mp. (10163)
- 31 ante partum.mp. (746)
- 32 developing country/ (99758)
- 33 developing countr\*.mp. [mp=title, abstract, heading word, drug trade name, original title, device manufacturer, drug manufacturer, device trade name, keyword heading word, floating subheading word, candidate term word] (148948)
- 34 low income countr\*.mp. (17463)
- 35 low income country/ (9603)
- 36 middle income countr\*.mp. (34073)
- 37 middle income country/ (13913)
- 38 LMIC.mp. (4053)
- 39 Eastern Europe.mp. or Eastern Europe/ or Pacific Islands.mp. or Pacific Islands/ or Indian Ocean Islands.mp. or Indian Ocean Islands/ or West Indies.mp. or West Indies/ or Atlantic Islands.mp. or Atlantic Islands/ or Africa.mp. or Africa/ or South America.mp. or South America/ or Latin America.mp. or Latin America/ or Central America.mp. or Central America/ or Asia.mp. or Asia/ (413531)
- 40 Afghanistan.mp. or Afghanistan/ or Albania.mp. or Albania/ or Algeria.mp. or Algeria/ or American Samoa.mp. or American Samoa/ or Angola.mp. or Angola/ or Argentina.mp. or Argentine Republic.mp. or Argentina/ or Armenia.mp. or Armenia/ or Azerbaijan.mp. or Azerbaijan/ or Bangladesh.mp. or Bangladesh/ or Belarus.mp. or Belarus/ or Belorussia.mp. or Belarus/ or Belize.mp. or Belize/ or Benin.mp. or Benin/ or Bhutan.mp. or Bhutan/ or Bolivia.mp. or Bolivia/ or Bosnia.mp. or Herzegovina.mp. or Hercegovina.mp. or (Bosnia.mp. and Herzegovina/) or Botswana.mp. or Botswana/ or Brazil.mp. or Brazil/ or Bulgaria.mp. or Bulgaria/ or Burkina Faso.mp. or Burkina Faso/ or Burundi.mp. or Burundi/ or Cabo Verde.mp. or Cape Verde/ or Cape Verde.mp. or Cambodia.mp. or Cambodia/ or Cameroon.mp. or Cameroon/ or Central African Republic.mp. or Central African Republic/ or Chad.mp. or Chad/ or China.mp. or China/ or Colombia.mp. or Colombia/ or Comoro\*.mp. or Comores.mp. or Comoros/ or Congo.mp. or Democratic Republic of the Congo/ or Congo/ or Costa Rica.mp. or Costa Rica/ or Ivory Coast.mp. or Cote d'Ivoire.mp. or Cote d'Ivoire/ or Cuba.mp. or Cuba/ or Djibouti.mp. or Djibouti/ or Dominica.mp. or Dominica/ or Dominican Republic.mp. or Dominican Republic/ or Ecuador.mp. or Ecuador/ or Egypt.mp. or Egypt/ or El Salvador.mp. or El Salvador/ or Equatorial Guinea.mp. or Equatorial Guinea/ or Eritrea.mp. or Eritrea/ or Eswatini.mp. or Swaziland.mp. or Eswatini/ or Ethiopia.mp. or Ethiopia/ or Fiji.mp. or Fiji/ or Gabon.mp. or Gabon/ or Gambia.mp. or Gambia/ or Georgia.mp. or Georgia/ or Ghana.mp. or Ghana/ or Grenada.mp. or Grenada/ or Guatemala.mp. or Guatemala/ or Guinea.mp. or Guinea/ or Guinea-Bissau.mp. or Guinea-Bissau/ or Guyana.mp. or Guyana/ or Haiti.mp. or Haiti/ or Honduras.mp. or Honduras/ or India.mp. or India/ or Indonesia.mp. or Indonesia/ or Iran.mp. or Iran/ or Iraq.mp. or Iraq/ or Jamaica.mp. or Jamaica/ or Jordan.mp. or Jordan/ or Kazakhstan.mp. or Kazakhstan/ or Kenya.mp. or Kenya/ or Kiribati.mp. or Kiribati/ or Korea.mp. or "Democratic People's Republic of Korea"/ or Kosovo.mp. or Kosovo/ or Kyrgyzstan.mp. or Kirghiz\*.mp. or Kyrgyz\*.mp. or Kyrgyzstan/ or Laos.mp. or Laos/ or Lao PDR.mp. or Laos/ or Lebanon.mp. or Lebanon/ or Lesotho.mp. or Lesotho/ or Liberia.mp. or Liberia/ or Libya.mp. or Libya/ or Madagascar.mp. or Madagascar/ or Malawi.mp. or Malawi/ or Malay\*.mp. or Malaysia/ or Maldives.mp. or Maldives/ or Mali.mp. or Mali/ or Marshall Islands.mp. or Marshall Islands/ or Mauritania.mp. or Mauritania/ or Mauritius.mp. or Mauritius/ or Mexico.mp. or Mexico/ or Micronesia.mp. or Micronesia/ or Moldova.mp. or Moldova/ or Mongolia.mp. or Mongolia/ or Montenegro.mp. or Montenegro/ or Morocco.mp. or Morocco/ or Mozambique.mp. or Mozambique/ or Myanmar.mp. or Myanmar/ or Burma.mp. or Namibia.mp. or Namibia/ or Nepal.mp. or Nepal/ or Nicaragua.mp. or Nicaragua/ or Niger.mp. or Niger/ or Nigeria.mp. or Nigeria/ or Macedonia.mp. or Republic of North Macedonia/ or Pakistan.mp. or Pakistan/ or Panama.mp. or Panama/ or Papua New Guinea.mp. or Papua New Guinea/ or Paraguay.mp. or Paraguay/ or Peru.mp. or Peru/ or Philippines.mp. or Philippines/ or Romania.mp. or Romania/ or Russia.mp. or Russia/ or Rwanda.mp. or Rwanda/ or Samoa.mp. or Samoa/ or Independent State of Samoa/ or Sao Tome.mp. or Principe.mp. or (Sao Tome.mp. and Principe/) or Senegal.mp. or Senegal/ or Serbia.mp. or Serbia/ or Sierra Leone.mp. or Sierra Leone/ or Solomon Islands.mp. or Solomon Islands/ or Somalia.mp. or Somalia/ or South Africa.mp. or South Africa/ or South Sudan.mp. or South Sudan/ or Sri Lanka.mp. or Sri Lanka/ or Lucia.mp. or Saint Lucia/ or Vincent.mp. or Grenadines.mp. or (Saint Vincent.mp. and the Grenadines/) or Sudan.mp. or Sudan/ or Surinam\*.mp. or Suriname/ or Syria.mp. or Syria/ or Tajik\*.mp. or Tadjik\*.mp. or Tadjik\*.mp. or Tajikistan/ or Tanzania.mp. or Tanzania/ or Thailand.mp. or Thailand/ or Timor\*.mp. or Timor-Leste/ or Togo.mp. or Togo/ or Tonga.mp. or Tonga/ or Tunisia.mp. or Tunisia/ or Turkey.mp. or Turkey/ or Turkmen\*.mp. or Turkmenistan/ or Tuvalu.mp. or Tuvalu/ or Uganda.mp. or Uganda/ or Ukraine.mp. or Ukraine/ or Uzbek\*.mp. or Uzbekistan/ or

Vanuatu.mp. or Vanuatu/ or Vietnam.mp. or Vietnam/ or Palestine.mp. or West Bank.mp. or Gaza.mp. or Yemen.mp. or Yemen/ or Zambia.mp. or Zambia/ or Zimbabwe.mp. or Zimbabwe/ [mp=title, abstract, heading word, drug trade name, original title, device manufacturer, drug manufacturer, device trade name, keyword heading word, floating subheading word, candidate term word] (2279243)

41 1 or 2 or 3 or 4 or 5 or 6 or 7 or 8 or 9 or 10 or 11 or 12 (17516)

42 13 or 14 or 15 or 16 or 17 or 18 or 19 or 20 or 21 or 22 or 23 or 24 or 25 or 26 or 27 or 28 or 29 or 30 or 31 (1819447)

43 32 or 33 or 34 or 35 or 36 or 37 or 38 or 39 or 40 (2551327)

44 41 and 42 and 43 (877)

|          |                      |
|----------|----------------------|
| Database | Global Health (Ovid) |
| Results  | 577                  |
| Date     | 21 January 2022      |

- 1 (Cash adj3 transfer\*).mp. [mp=abstract, title, original title, broad terms, heading words, identifiers, cabicodes] (785)
- 2 (Cash adj3 payment\*).mp. [mp=abstract, title, original title, broad terms, heading words, identifiers, cabicodes] (75)
- 3 Cash incentiv\*.mp. [mp=abstract, title, original title, broad terms, heading words, identifiers, cabicodes] (113)
- 4 Voucher\*.mp. [mp=abstract, title, original title, broad terms, heading words, identifiers, cabicodes] (1080)
- 5 (Cash adj3 assistance).mp. [mp=abstract, title, original title, broad terms, heading words, identifiers, cabicodes] (59)
- 6 Financ\* incentiv\*.mp. [mp=abstract, title, original title, broad terms, heading words, identifiers, cabicodes] (1252)
- 7 Mone\* incentiv\*.mp. [mp=abstract, title, original title, broad terms, heading words, identifiers, cabicodes] (242)
- 8 Mone\* transfer\*.mp. [mp=abstract, title, original title, broad terms, heading words, identifiers, cabicodes] (20)
- 9 Cash based intervention\*.mp. [mp=abstract, title, original title, broad terms, heading words, identifiers, cabicodes] (12)
- 10 Social insurance.mp. (521)
- 11 social insurance/ (120)
- 12 community-based insurance.mp. (13)
- 13 antenat\*.mp. [mp=abstract, title, original title, broad terms, heading words, identifiers, cabicodes] (18571)
- 14 ante nat\*.mp. [mp=abstract, title, original title, broad terms, heading words, identifiers, cabicodes] (342)
- 15 ANC.mp. (2742)
- 16 Perinat\*.mp. (16727)
- 17 peri nat\*.mp. [mp=abstract, title, original title, broad terms, heading words, identifiers, cabicodes] (63)
- 18 prenatal\*.mp. [mp=abstract, title, original title, broad terms, heading words, identifiers, cabicodes] (26852)
- 19 pre nat\*.mp. [mp=abstract, title, original title, broad terms, heading words, identifiers, cabicodes] (484)
- 20 prenatal care/ (3765)
- 21 matern\*.mp. (89713)
- 22 maternity services/ (4857)
- 23 primary care.mp. (21106)
- 24 primary health\*.mp. [mp=abstract, title, original title, broad terms, heading words, identifiers, cabicodes] (26124)
- 25 primary health care/ (18029)
- 26 pregna\*.mp. (131634)
- 27 pregnancy/ (102766)
- 28 antepartum.mp. (1020)
- 29 ante partum.mp. [mp=abstract, title, original title, broad terms, heading words, identifiers, cabicodes] (79)
- 30 prenatal screening/ (2123)
- 31 developing countr\*.mp. [mp=abstract, title, original title, broad terms, heading words, identifiers, cabicodes] (987316)
- 32 developing countries/ (978914)
- 33 low income countr\*.mp. [mp=abstract, title, original title, broad terms, heading words, identifiers, cabicodes] (5257)
- 34 middle income countr\*.mp. [mp=abstract, title, original title, broad terms, heading words, identifiers, cabicodes] (20934)
- 35 LMIC.mp. (1225)

36 Eastern Europe.mp. or Eastern Europe/ or Pacific Islands.mp. or Pacific Islands/ or Indian Ocean Islands.mp. or Indian Ocean Islands/ or West Indies.mp. or West Indies/ or Caribbean.mp. or Caribbean/ or Atlantic Islands.mp. or Atlantic Islands/ or Africa.mp. or Africa/ or South America.mp. or South America/ or Latin America.mp. or Latin America/ or Central America.mp. or Central America/ or Asia.mp. or Asia/ (1164860)

37 Afghanistan.mp. or Afghanistan/ or Albania.mp. or Albania/ or Algeria.mp. or Algeria/ or American Samoa.mp. or American Samoa/ or Angola.mp. or Angola/ or Argentina.mp. or Argentina Republic.mp. or Argentina/ or Armenia.mp. or Armenia/ or Azerbaijan.mp. or Azerbaijan/ or Bangladesh.mp. or Bangladesh/ or Belarus.mp. or Byelarus.mp. or Belorussia.mp. or Belarus/ or Belize.mp. or Belize/ or Benin.mp. or Benin/ or Bhutan.mp. or Bhutan/ or Bolivia.mp. or Bolivia/ or Bosnia.mp. or Herzegovina.mp. or Hercegovina.mp. or (Bosnia.mp. and Herzegovina/) or Botswana.mp. or Botswana/ or Brazil.mp. or Brazil/ or Bulgaria.mp. or Bulgaria/ or Burkina Faso.mp. or Burkina Faso/ or Burundi.mp. or Burundi/ or Cabo Verde.mp. or Cape Verde/ or Cape Verde.mp. or Cambodia.mp. or Cambodia/ or Cameroon.mp. or Cameroon/ or Central African Republic.mp. or Central African Republic/ or Chad.mp. or Chad/ or China.mp. or China/ or Colombia.mp. or Colombia/ or Comoro\*.mp. or Comores.mp. or Comoros/ or Congo.mp. or Democratic Republic of the Congo/ or Congo/ or Costa Rica.mp. or Costa Rica/ or Ivory Coast.mp. or Cote d'Ivoire.mp. or Cote d'Ivoire/ or Cuba.mp. or Cuba/ or Djibouti.mp. or Djibouti/ or Dominica.mp. or Dominica/ or Dominican Republic.mp. or Dominican Republic/ or Ecuador.mp. or Ecuador/ or Egypt.mp. or Egypt/ or El Salvador.mp. or El Salvador/ or Equatorial Guinea.mp. or Equatorial Guinea/ or Eritrea.mp. or Eritrea/ or Eswatini.mp. or Swaziland.mp. or Eswatini/ or Ethiopia.mp. or Ethiopia/ or Fiji.mp. or Fiji/ or Gabon.mp. or Gabon/ or Gambia.mp. or Gambia/ or Georgia.mp. or Georgia/ or Ghana.mp. or Ghana/ or Grenada.mp. or Grenada/ or Guatemala.mp. or Guatemala/ or Guinea.mp. or Guinea/ or Guinea-Bissau.mp. or Guinea-Bissau/ or Guyana.mp. or Guyana/ or Haiti.mp. or Haiti/ or Honduras.mp. or Honduras/ or India.mp. or India/ or Indonesia.mp. or Indonesia/ or Iran.mp. or Iran/ or Iraq.mp. or Iraq/ or Jamaica.mp. or Jamaica/ or Jordan.mp. or Jordan/ or Kazakhstan.mp. or Kazakhstan/ or Kenya.mp. or Kenya/ or Kiribati.mp. or Kiribati/ or Korea.mp. or "Democratic People's Republic of Korea"/ or Kosovo.mp. or Kosovo/ or Kyrgyzstan.mp. or Kirghiz\*.mp. or Kyrgyz\*.mp. or Kyrgyzstan/ or Laos.mp. or Lao PDR.mp. or Laos/ or Lebanon.mp. or Lebanon/ or Lesotho.mp. or Lesotho/ or Liberia.mp. or Liberia/ or Libya.mp. or Libya/ or Madagascar.mp. or Madagascar/ or Malawi.mp. or Malawi/ or Malay\*.mp. or Malaysia/ or Maldives.mp. or Maldives/ or Mali.mp. or Mali/ or Marshall Islands.mp. or Marshall Islands/ or Mauritania.mp. or Mauritania/ or Mauritius.mp. or Mauritius/ or Mexico.mp. or Mexico/ or Micronesia.mp. or Micronesia/ or Moldova.mp. or Moldova/ or Mongolia.mp. or Mongolia/ or Montenegro/ or Morocco.mp. or Morocco/ or Mozambique.mp. or Mozambique/ or Myanmar.mp. or Myanmar/ or Burma.mp. or Namibia.mp. or Namibia/ or Nepal.mp. or Nepal/ or Nicaragua.mp. or Nicaragua/ or Niger.mp. or Niger/ or Nigeria.mp. or Nigeria/ or Macedonia.mp. or Republic of North Macedonia/ or Pakistan.mp. or Pakistan/ or Panama.mp. or Panama/ or Papua New Guinea.mp. or Papua New Guinea/ or Paraguay.mp. or Paraguay/ or Peru.mp. or Peru/ or Philippines.mp. or Philippines/ or Romania.mp. or Romania/ or Russia.mp. or Russia/ or Rwanda.mp. or Ruanda.mp. or Rwanda/ or Samoa.mp. or Independent State of Samoa/ or Sao Tome.mp. or Principe.mp. or (Sao Tome.mp. and Principe/) or Senegal.mp. or Senegal/ or Serbia.mp. or Serbia/ or Sierra Leone.mp. or Sierra Leone/ or Solomon Islands.mp. or Solomon Islands/ or Somalia.mp. or Somalia/ or South Africa.mp. or South Africa/ or South Sudan.mp. or South Sudan/ or Sri Lanka.mp. or Sri Lanka/ or Lucia.mp. or Saint Lucia/ or Vincent.mp. or Grenadines.mp. or (Saint Vincent.mp. and the Grenadines/) or Sudan.mp. or Sudan/ or Surinam\*.mp. or Suriname/ or Syria.mp. or Syria/ or Tajik\*.mp. or Tadjik\*.mp. or Tadjik\*.mp. or Tajikistan/ or Tanzania.mp. or Tanzania/ or Thailand.mp. or Thailand/ or Timor\*.mp. or Timor-Leste/ or Togo.mp. or Togo/ or Tonga.mp. or Tonga/ or Tunisia.mp. or Tunisia/ or Turkey.mp. or Turkey/ or Turkmen\*.mp. or Turkmenistan/ or Tuvalu.mp. or Tuvalu/ or Uganda.mp. or Uganda/ or Ukraine.mp. or Ukraine/ or Uzbek\*.mp. or Uzbekistan/ or Vanuatu.mp. or Vanuatu/ or Vietnam.mp. or Vietnam/ or Palestine.mp. or West Bank.mp. or Gaza.mp. or Gaza/ or Yemen.mp. or Yemen/ or Zambia.mp. or Zambia/ or Zimbabwe.mp. or Zimbabwe/ [mp=abstract, title, original title, broad terms, heading words, identifiers, cabicodes] [1047629]

38 1 or 2 or 3 or 4 or 5 or 6 or 7 or 8 or 9 or 10 or 11 or 12 (3924)

39 13 or 14 or 15 or 16 or 17 or 18 or 19 or 20 or 21 or 22 or 23 or 24 or 25 or 26 or 27 or 28 or 29 or 30 (212249)

40 31 or 32 or 33 or 34 or 35 or 36 or 37 (1275836)

41 38 and 39 and 40 (577)

| Database | Medline (Ovid)  |
|----------|-----------------|
| Results  | 848             |
| Date     | 21 January 2022 |

1 (cash adj3 transfer\*).mp. (924)

2 (cash adj3 payment\*).mp. [mp=title, abstract, original title, name of substance word, subject heading word, floating sub-heading word, keyword heading word, organism supplementary concept word, protocol supplementary concept word, rare disease supplementary concept word, unique identifier, synonyms] (198)

3 cash incentiv\*.mp. [mp=title, abstract, original title, name of substance word, subject heading word, floating sub-heading word, keyword heading word, organism supplementary concept word, protocol supplementary concept word, rare disease supplementary concept word, unique identifier, synonyms] (235)

4 voucher\*.mp. (2543)

5 (cash adj3 assistance).mp. [mp=title, abstract, original title, name of substance word, subject heading word, floating sub-heading word, keyword heading word, organism supplementary concept word, protocol supplementary concept word, rare disease supplementary concept word, unique identifier, synonyms] (151)

6 financ\* incentiv\*.mp. [mp=title, abstract, original title, name of substance word, subject heading word, floating sub-heading word, keyword heading word, organism supplementary concept word, protocol supplementary concept word, rare disease supplementary concept word, unique identifier, synonyms] (5230)

7 mone\* incentiv\*.mp. [mp=title, abstract, original title, name of substance word, subject heading word, floating sub-heading word, keyword heading word, organism supplementary concept word, protocol supplementary concept word, rare disease supplementary concept word, unique identifier, synonyms] (1394)

8 mone\* transfer\*.mp. [mp=title, abstract, original title, name of substance word, subject heading word, floating sub-heading word, keyword heading word, organism supplementary concept word, protocol supplementary concept word, rare disease supplementary concept word, unique identifier, synonyms] (67)

9 cash based intervention\*.mp. (9)

10 Social insurance.mp. (2123)

11 exp Social security/ (8397)

12 Community-based insurance.mp. [mp=title, abstract, original title, name of substance word, subject heading word, floating sub-heading word, keyword heading word, organism supplementary concept word, protocol supplementary concept word, rare disease supplementary concept word, unique identifier, synonyms] (25)

13 community-based health insurance/ (43)

14 antenat\*.mp. [mp=title, abstract, original title, name of substance word, subject heading word, floating sub-heading word, keyword heading word, organism supplementary concept word, protocol supplementary concept word, rare disease supplementary concept word, unique identifier, synonyms] (42675)

15 ante nat\*.mp. (647)

16 ANC.mp. (5759)

17 perinat\*.mp. (87644)

18 Perinatal Care/ (5133)



19 peri nat\*.mp. (238)

20 prenat\*.mp. (191959)

21 Prenatal Care/ (30659)

22 matern\*.mp. [mp=title, abstract, original title, name of substance word, subject heading word, floating sub-heading word, keyword heading word, organism supplementary concept word, protocol supplementary concept word, rare disease supplementary concept word, unique identifier, synonyms] (369304)

23 primary care.mp. [mp=title, abstract, original title, name of substance word, subject heading word, floating sub-heading word, keyword heading word, organism supplementary concept word, protocol supplementary concept word, rare disease supplementary concept word, unique identifier, synonyms] (131882)

24 primary health\*.mp. [mp=title, abstract, original title, name of substance word, subject heading word, floating sub-heading word, keyword heading word, organism supplementary concept word, protocol supplementary concept word, rare disease supplementary concept word, unique identifier, synonyms] (109340)

25 maternal-child health services/ (937)

26 pre nat\*.mp. (1644)

27 Pregnancy/ (933890)

28 pregna\*.mp. (1073445)

29 antepartum.mp. (6290)

30 ante partum.mp. (479)

31 Developing Countries/ (78551)

32 developing countr\*.mp. (135974)

33 low income countr\*.mp. (8349)

34 middle income countr\*.mp. (26526)

35 LMIC.mp. (3103)

36 Eastern Europe.mp. or Eastern Europe/ or Pacific Islands.mp. or Pacific Islands/ or Indian Ocean Islands.mp. or Indian Ocean Islands/ or West Indies.mp. or West Indies/ or Caribbean.mp. or Caribbean/ or Atlantic Islands.mp. or Atlantic Islands/ or Africa.mp. or Africa/ or South America.mp. or South America/ or Latin America.mp. or Latin America/ or Central America.mp. or Central America/ or Asia.mp. or Asia/ (325525)

37 Afghanistan.mp. or Afghanistan/ or Albania.mp. or Albania/ or Algeria.mp. or Algeria/ or American Samoa.mp. or American Samoa/ or Angola.mp. or Angola/ or Argentina.mp. or Argentine Republic.mp. or Argentina/ or Armenia.mp. or Armenia/ or Azerbaijan.mp. or Azerbaijan/ or Bangladesh.mp. or Bangladesh/ or Belarus.mp. or Byelarus.mp. or Belorussia.mp. or Belarus/ or Belize.mp. or Belize/ or Benin.mp. or Benin/ or Bhutan.mp. or Bhutan/ or Bolivia.mp. or Bolivia/ or Bosnia.mp. or Hercegovina.mp. or Hercegovina/ or (Bosnia.mp. and Hercegovina/) or Botswana.mp. or Botswana/ or Brazil.mp. or Brazil/ or Bulgaria.mp. or Bulgaria/ or Burkina Faso.mp. or Burkina Faso/ or Burundi.mp. or Burundi/ or Cabo Verde.mp. or Cabo Verde/ or Cape Verde.mp. or Cape Verde/ or Cambodia.mp. or Cambodia/ or Cameroon.mp. or Cameroon/ or Central African Republic.mp. or Central African Republic/ or Chad.mp. or Chad/ or China.mp. or China/ or Colombia.mp. or Colombia/ or Comoro\*.mp. or Comores.mp. or Comoros/ or Congo.mp. or Democratic Republic of the Congo/ or Congo/ or Costa Rica.mp. or Costa Rica/ or Ivory Coast.mp. or Cote d'Ivoire.mp. or Cote d'Ivoire/ or Cuba.mp. or Cuba/ or Djibouti.mp. or Djibouti/ or Dominica.mp. or Dominica/ or Dominican Republic.mp. or Dominican Republic/ or Ecuador.mp. or Ecuador/ or Egypt.mp. or Egypt/ or El Salvador.mp. or El Salvador/ or Equatorial Guinea.mp. or Equatorial Guinea/ or Eritrea.mp. or Eritrea/ or Eswatini.mp. or Swaziland.mp. or Eswatini/ or Ethiopia.mp. or Ethiopia/ or Fiji.mp. or Fiji/ or Gabon.mp. or Gabon/ or Gambia.mp. or Gambia/ or Georgia.mp. or Georgia/ or Ghana.mp. or Ghana/ or Grenada.mp. or Grenada/ or Guatemala.mp. or Guatemala/ or Guinea.mp. or Guinea/ or Guinea-Bissau.mp. or Guinea-Bissau/ or Guyana.mp. or Guyana/ or Haiti.mp. or Haiti/ or Honduras.mp. or Honduras/ or India.mp. or India/ or Indonesia.mp. or Indonesia/ or Iran.mp. or Iran/ or Iraq.mp. or Iraq/ or Jamaica.mp. or Jamaica/ or Jordan.mp. or Jordan/ or Kazakhstan.mp. or Kazakhstan/ or Kenya.mp. or Kenya/ or Kiribati.mp. or Kiribati/ or Korea.mp. or "Democratic People's Republic of Korea"/ or Kosovo.mp. or Kosovo/ or Kirghiz\*.mp. or Kyrgyz\*.mp. or Kyrgyzstan/ or Laos.mp. or Lao PDR.mp. or Laos/ or Lebanon.mp. or Lebanon/ or Lesotho.mp. or Lesotho/ or Liberia.mp. or Liberia/ or Libya.mp. or Libya/ or Madagascar.mp. or Madagascar/ or Malawi.mp. or Malawi/ or Malay\*.mp. or Malaysia/ or Maldives.mp. or Maldives/ or Mali.mp. or Mali/ or Marshall Islands.mp. or Marshall Islands/ or Mauritania.mp. or Mauritania/ or Mauritius.mp. or Mauritius/ or Mexico.mp. or Mexico/ or Micronesia.mp. or Micronesia/ or Moldova.mp. or Moldova/ or Mongolia.mp. or Mongolia/ or Montenegro.mp. or Montenegro/ or Morocco.mp. or Morocco/ or Mozambique.mp. or Mozambique/ or Myanmar.mp. or Myanmar/ or Burma.mp. or Namibia.mp. or Namibia/ or Nepal.mp. or Nepal/ or Nicaragua.mp. or Nicaragua/ or Niger.mp. or Niger/ or Nigeria.mp. or Nigeria/ or Macedonia.mp. or Republic of North Macedonia/ or Pakistan.mp. or Pakistan/ or Panama.mp. or Panama/ or Papua New Guinea.mp. or Papua New Guinea/ or Paraguay.mp. or Paraguay/ or Peru.mp. or Peru/ or Philippines.mp. or Philippines/ or Romania.mp. or Romania/ or Russia.mp. or Russia/ or Rwanda.mp. or Rwanda/ or Samoa.mp. or Independent State of Samoa/ or Sao Tome.mp. or Principe.mp. or (Sao Tome.mp. and Principe/) or Senegal.mp. or Senegal/ or Serbia.mp. or Serbia/ or Sierra Leone.mp. or Sierra Leone/ or Solomon Islands.mp. or Solomon Islands/ or Somalia.mp. or Somalia/ or South Africa.mp. or South Africa/ or South Sudan.mp. or South Sudan/ or Sri Lanka.mp. or Sri Lanka/ or Lucia.mp. or Saint Lucia/ or Vincent.mp. or Grenadines.mp. or (Saint Vincent.mp. and the Grenadines/) or Sudan.mp. or Sudan/ or Surinam\*.mp. or Suriname/ or Syria.mp. or Syria/ or Tajik\*.mp. or Tadjik\*.mp. or Tadjik\*.mp. or Tajikistan/ or Tanzania.mp. or Tanzania/ or Thailand.mp. or Thailand/ or Timor\*.mp. or Timor-Leste/ or Togo.mp. or Togo/ or Tonga.mp. or Tonga/ or Tunisia.mp. or Tunisia/ or Turkey.mp. or Turkey/ or Turkmen\*.mp. or Turkmenistan/ or Tuvalu.mp. or Tuvalu/ or Uganda.mp. or Uganda/ or Ukraine.mp. or Ukraine/ or Uzbek\*.mp. or Uzbekistan/ or Vanuatu.mp. or Vanuatu/ or Vietnam.mp. or Vietnam/ or Palestine.mp. or West Bank.mp. or Gaza.mp. or Yemen.mp. or Yemen/ or Zambia.mp. or Zambia/ or Zimbabwe.mp. or Zimbabwe/ [mp=title, abstract, original title, name of substance word, subject heading word, floating sub-heading word, keyword heading word, organism supplementary concept word, protocol supplementary concept word, rare disease supplementary concept word, unique identifier, synonyms] (1794374)

38 1 or 2 or 3 or 4 or 5 or 6 or 7 or 8 or 9 or 10 or 11 or 12 or 13 (20308)

39 14 or 15 or 16 or 17 or 18 or 19 or 20 or 21 or 22 or 23 or 24 or 25 or 26 or 27 or 28 or 29 or 30 (1433855)

40 31 or 32 or 33 or 34 or 35 or 36 or 37 (1993866)

41 38 and 39 and 40 (848)

|          |                                         |
|----------|-----------------------------------------|
| Database | Maternity & Infant Care Database (Ovid) |
| Results  | 162                                     |
| Date     | 21 January 2022                         |

1 (Cash adj3 transfer\*).mp. [mp=abstract, heading word, title] (88)

2 (cash adj3 payment\*).mp. [mp=abstract, heading word, title] (6)

3 cash incentiv\*.mp. [mp=abstract, heading word, title] (30)

4 voucher\*.mp. [mp=abstract, heading word, title] (143)

5 (cash adj3 assistance).mp. [mp=abstract, heading word, title] (11)

6 financ\* incentiv\*.mp. [mp=abstract, heading word, title] (144)

7 mone\* incentiv\*.mp. [mp=abstract, heading word, title] (17)

8 mone\* transfer\*.mp. [mp=abstract, heading word, title] (1)

9 cash based intervention\*.mp. [mp=abstract, heading word, title] (2)

10 Social insurance.mp. (20)

11 community-based insurance.mp. [mp=abstract, heading word, title] (0)

12 antenat\*.mp. [mp=abstract, heading word, title] (24559)

13 ante nat\*.mp. [mp=abstract, heading word, title] (181)

14 ANC.mp. [mp=abstract, heading word, title] (995)

15 Perinat\*.mp. [mp=abstract, heading word, title] (27487)

16 Peri nat\*.mp. [mp=abstract, heading word, title] (23)

17 Prenat\*.mp. [mp=abstract, heading word, title] (25290)

18 Pre nat\*.mp. [mp=abstract, heading word, title] (148)

19 Matern\*.mp. [mp=abstract, heading word, title] (88912)

20 Primary care.mp. [mp=abstract, heading word, title] (2502)

21 Primary health\*.mp. [mp=abstract, heading word, title] (1471)

22 pregna\*.mp. [mp=abstract, heading word, title] (127997)

23 antepartum.mp. [mp=abstract, heading word, title] (2784)

24 ante partum.mp. [mp=abstract, heading word, title] (69)

25 developing countr\*.mp. [mp=abstract, heading word, title] (13467)

26 low income countr\*.mp. [mp=abstract, heading word, title] (679)

27 middle income countr\*.mp. [mp=abstract, heading word, title] (1438)

28 LMIC.mp. [mp=abstract, heading word, title] (105)

29 (Eastern Europe or Pacific Islands or Indian Ocean Islands or West Indies or Caribbean or Atlantic Islands or Africa or South America or Latin America or Central America or Asia).mp. (13162)

30 (Afghanistan or Albania or Algeria or American Samoa or Angola or Argentina or Argentine Republic or Armenia or Azerbaijan or Bangladesh or Belarus or Byelarus or Belorussia or Belize or Benin or Bhutan or Bolivia or Bosnia or Herzegovina or Botswana or Brazil or Bulgaria or Burkina Faso or Burundi or Cabo Verde or Cape Verde or Cambodia or Cameroon or Central African Republic or Chad or China or Colombia or Comoro\* or Comores or Congo or Costa Rica or Ivory Coast or Cote d'Ivoire or Cuba or Djibouti or Dominica or Dominican Republic or Ecuador or Egypt or El Salvador or Equatorial Guinea or Eritrea or Eswatini or Swaziland or Ethiopia or Fiji or Gabon or Gambia or Georgia or Ghana or Grenada or Guatemala or Guinea or Guinea-Bissau or Guyana or Haiti or Honduras or India or Indonesia or Iran or Iraq or Jamaica or Jordan or Kazakhstan or Kenya or Kiribati or Korea or Kosovo or Kirghiz\* or Kyrgyz\* or Laos or Lao PDR or Lebanon or Lesotho or Liberia or Libya or Madagascar or Malawi or Malay\* or Maldives or Mali or Marshall Islands or Mauritania or Mauritius or Mexico or Micronesia or Moldova or Mongolia or Montenegro or Morocco or Mozambique or Myanmar or Burma or Namibia or Nepal or Nicaragua or Niger or Nigeria or Macedonia or Pakistan or Panama or Papua New Guinea or Paraguay or Peru or Philippines or Philippines or Romania or Russia or Rwanda or Ruanda or Samoa or Sao Tome or Principe or Senegal or Serbia or Sierra Leone or Solomon Islands or Somalia or South Africa or South Sudan or Sri Lanka or Lucia or Vincent or Grenadines or Sudan or Surinam\* or Syria or Tajik\* or Tadjik\* or Tadhik\* or Tanzania or Thailand or Timor\* or Togo or Tonga or Tunisia or Turkey or Turkmen\* or Tuvalu or Uganda or Ukraine or Uzbek\* or Vanuatu or Vietnam or Palestine or West Bank or Gaza or Yemen or Zambia or Zimbabwe).mp. [mp=abstract, heading word, title] (27340)

31 1 or 2 or 3 or 4 or 5 or 6 or 7 or 8 or 9 or 10 or 11 (420)

32 12 or 13 or 14 or 15 or 16 or 17 or 18 or 19 or 20 or 21 or 22 or 23 or 24 (181387)

33 25 or 26 or 27 or 28 or 29 or 30 (34577)

34 31 and 32 and 33 (162)

## Appendix B: Grey literature

The websites of the following organisations were screened.

- Online sources from expert organizations including:
  - WHO
    - <https://www.who.int/publications>

- <https://apps.who.int/iris>
- <https://kohahq.searo.who.int>
- <https://www.globalindexmedicus.net>
- UNICEF
  - <https://www.unicef-irc.org>
  - <https://www.unicef.org/research-and-reports>
- UNFPA
  - <https://www.unfpa.org/publications>
- World Bank
  - <https://www.worldbank.org/en/research>
- USAID
  - <https://www.usaid.gov/site-search>
- Management Sciences for Health
  - <https://www.msh.org/resources>
- Oxford Policy Management
  - <https://www.opml.co.uk/publications>
- Save the Children
  - <https://www.savethechildren.net/research-reports>
  - <https://www.savethechildren.org/us/about-us/resource-library>
- Oxfam
  - <https://www.oxfam.org/en/research>
- EQUINET
  - <https://www.equinetafrica.org/par/sections/participatory-action-research-publications-journal-papers-and-reports>
- IntraHealth
  - <https://www.intrahealth.org/resources>
- ICRIER
  - <https://icrier.org/publications>
- Inter-American Development Bank
  - <https://publications.iadb.org/en>
- Asian Development Bank
  - <https://www.adb.org/search>
- University sources including:
  - Erasmus University International Institute of Social Studies
    - <https://repub.eur.nl/org/9739>
  - University of Southampton
    - <https://www.southampton.ac.uk/research.page>
  - International Centre for Diarrhoeal Disease Research and the Centre for Health and Population Research
    - <http://lis.icddrb.org:8380/liberty/libraryHome.do>
  - Boston University Institute for Economic Development
    - <https://www.bu.edu/econ/research/>
  - University of Sussex Institute of Development Studies
    - <https://www.sussex.ac.uk/research/explore-our-research>
  - London School of Hygiene and Tropical Medicine
    - <https://researchonline.lshtm.ac.uk>
  - Institute of Policy Analysis and Research

- <https://www.ippr.org/research>
- <http://www.ipar-rwanda.org/what-we-do/research-policy-analysis/publications/>
- University of Cape Town Development Policy Research Unit
  - <http://www.dpru.uct.ac.za/>
- The Transfer Project
  - <https://transfer.cpc.unc.edu/publications>

## Appendix C: Cash transfers by programme

| No | Programme and location                                                                   | Monetary benefits as reported in studies                                                                                                                                                    |                    | 2022 Adjusted monetary benefits per pregnancy |
|----|------------------------------------------------------------------------------------------|---------------------------------------------------------------------------------------------------------------------------------------------------------------------------------------------|--------------------|-----------------------------------------------|
|    |                                                                                          | Description                                                                                                                                                                                 | Per pregnancy      |                                               |
| A  | Program Keluarga Harapan <sup>26 37</sup><br>Indonesia<br>(6 provinces)                  | Between US\$60 and US\$220 per year depending on household characteristics.                                                                                                                 | US\$45 to US\$165  | US\$52.5 to US\$191.5                         |
| B  | M-Kadi <sup>31</sup><br>Kenya<br>(Vihiga county)                                         | US\$3 per ANC or PNC visit (maximum 4 ANC and 3 PNC visits) and US\$6 per delivery.<br>Maximum total per pregnancy: US\$27.                                                                 | US\$27             | US\$29.5                                      |
| C  | Oportunidades <sup>27</sup><br>(previously called PROGRESA)<br>Mexico                    | US\$15 per household per month (health transfer).                                                                                                                                           | US\$135            | US\$172.5                                     |
| D  | Comunidades Solidarias Rurales <sup>35</sup><br>El Salvador                              | US\$15 per month for households eligible for the health or education benefit.<br>US\$20 per month for households eligible for health and education benefits.                                | US\$135 to US\$180 | US\$145.5 to US\$194                          |
| E  | JUNTOS <sup>41</sup><br>Peru                                                             | US\$70 each 2 months, transferred to the female head of household.                                                                                                                          | US\$315            | US\$343.5                                     |
| F  | Safe Motherhood Programme<br>(Janani Suraksha Yojana) <sup>32 38 40 42 44</sup><br>India | Low performing states:<br>▪ US\$19 rural beneficiaries.<br>▪ US\$13.5 urban beneficiaries.<br><br>High performing states:<br>▪ US\$9.5 rural beneficiaries.<br>▪ US\$8 urban beneficiaries. | US\$8 to US\$19    | US\$8.5 to US\$20.5                           |
| G  | SURE-P/MCH <sup>33</sup><br>Nigeria<br>(9 states)                                        | US\$6 for the first ANC visit, US\$2 per additional ANC visit (up to 4), US\$12 per delivery and US\$6 for PNC visit.                                                                       | US\$30             | US\$35.5                                      |
| H  | Safe Delivery Incentive Programme <sup>43</sup><br>Nepal<br>(Makwanpur district)         | US\$16 per facility-based delivery if no more than two children or an obstetric complication.                                                                                               | US\$16             | US\$21                                        |

|   |                                                                                                         |                                                                                                                    |                     |                       |
|---|---------------------------------------------------------------------------------------------------------|--------------------------------------------------------------------------------------------------------------------|---------------------|-----------------------|
| I | Mamata Scheme <sup>39</sup><br>India<br>(Odisha state)                                                  | US\$70 per pregnancy.                                                                                              | US\$70              | US\$70                |
| J | Conditional cash transfer programme <sup>34</sup><br>(no specific name)<br>Afghanistan<br>(3 provinces) | US\$15 for each facility-based delivery.                                                                           | US\$15              | US\$16.5              |
| K | Pantawid Pamilya <sup>36</sup><br>Philippines<br>(4 provinces)                                          | US\$11 to US\$32 every 2 months.<br>(mix of health and education grants which depend on household characteristics) | US\$49.5 to US\$144 | US\$57.5 to US\$167.5 |
| L | Conditional cash transfer programme <sup>29</sup><br>(no specific name)<br>Nigeria<br>(5 states)        | US\$14 per pregnancy.                                                                                              | US\$14              | US\$15                |
| M | Afya Credits Incentive <sup>30</sup><br>Kenya<br>(Siaya county)                                         | US\$4.5 per scheduled health visit, 7 visits per pregnancy.                                                        | US\$31.5            | US\$31.5              |

## Appendix D: Risk of bias by study

### Randomized controlled trials

| Domain                | Signalling Question                                                                                        | Grépin <i>et al</i> <sup>31</sup> | Barber and Gertler <sup>27</sup> | Kandpal <i>et al</i> <sup>36</sup> | Okeke and Abubakar <sup>29</sup> | Triyana <sup>26</sup> | Vanhuyse <i>et al</i> <sup>30</sup> |
|-----------------------|------------------------------------------------------------------------------------------------------------|-----------------------------------|----------------------------------|------------------------------------|----------------------------------|-----------------------|-------------------------------------|
|                       |                                                                                                            | 2019                              | 2010                             | 2016                               | 2020                             | 2016                  | 2022                                |
| Randomization Process | 1.1 Was the allocation sequence random?                                                                    | Yes                               | Yes                              | Yes                                | Yes                              | Yes                   | Yes                                 |
|                       | 1.2 Was the allocation sequence concealed until participants were enrolled and assigned to interventions?  | No                                | Yes                              | Yes                                | No                               | Yes                   | No                                  |
|                       | 1.3 Did baseline differences between intervention groups suggest a problem with the randomization process? | No                                | No                               | No                                 | No                               | No                    | No                                  |
|                       | <b>Risk of bias judgement</b>                                                                              | <b>High risk</b>                  | <b>Low risk</b>                  | <b>Low risk</b>                    | <b>High risk</b>                 | <b>Low risk</b>       | <b>High risk</b>                    |
|                       | 2.1 Were participants aware of their assigned intervention during the trial?                               | Yes                               | Yes                              | Yes                                | Yes                              | Yes                   | Yes                                 |

|                                        |                                                                                                                                                                                                                             |                 |                 |                 |                 |                 |                      |
|----------------------------------------|-----------------------------------------------------------------------------------------------------------------------------------------------------------------------------------------------------------------------------|-----------------|-----------------|-----------------|-----------------|-----------------|----------------------|
| Deviations from intended interventions | 2.2 Were carers and people delivering the interventions aware of participants' assigned intervention during the trial?                                                                                                      | No info         | Yes                  |
|                                        | 2.3. If Y/PY/NI to 2.1 or 2.2: Were there deviations from the intended intervention that arose because of the trial context?                                                                                                | No              | No              | No              | No              | No              | Yes                  |
|                                        | 2.4 If Y/PY to 2.3: Were these deviations likely to have affected the outcome?                                                                                                                                              | Not applicable  | Possibly No          |
|                                        | 2.5. If Y/PY/NI to 2.4: Were these deviations from intended intervention balanced between groups?                                                                                                                           | Not applicable       |
|                                        | 2.6 Was an appropriate analysis used to estimate the effect of assignment to intervention?                                                                                                                                  | Yes             | Yes             | Yes             | Yes             | Yes             | Yes                  |
|                                        | 2.7 If N/PN/NI to 2.6: Was there potential for a substantial impact (on the result) of the failure to analyse participants in the group to which they were randomized?                                                      | Not applicable       |
|                                        | <b>Risk of bias judgement</b>                                                                                                                                                                                               | <b>Low risk</b> | <b>Moderate risk</b> |
| Missing outcome data                   | 3.1 Were data for this outcome available for all, or nearly all, participants randomized?                                                                                                                                   | Yes             | Yes             | Yes             | Yes             | Yes             | Yes                  |
|                                        | 3.2 If N/PN/NI to 3.1: Is there evidence that the result was not biased by missing outcome data?                                                                                                                            | Not applicable       |
|                                        | 3.3 If N/PN to 3.2: Could missingness in the outcome depend on its true value?                                                                                                                                              | Not applicable       |
|                                        | 3.4 If Y/PY/NI to 3.3: Is it likely that missingness in the outcome depended on its true value?                                                                                                                             | Not applicable       |
|                                        | <b>Risk of bias judgement</b>                                                                                                                                                                                               | <b>Low risk</b>      |
| Measurement of the outcome             | 4.1 Was the method of measuring the outcome inappropriate?                                                                                                                                                                  | No              | No              | No              | No              | No              | No                   |
|                                        | 4.2 Could measurement or ascertainment of the outcome have differed between intervention groups?                                                                                                                            | Possibly No          |
|                                        | 4.3 If N/PN/NI to 4.1 and 4.2: Were outcome assessors aware of the intervention received by study participants?                                                                                                             | No              | No              | No              | No              | No              | No                   |
|                                        | 4.4 If Y/PY/NI to 4.3: Could assessment of the outcome have been influenced by knowledge of intervention received?                                                                                                          | Not applicable       |
|                                        | 4.5 If Y/PY/NI to 4.4: Is it likely that assessment of the outcome was influenced by knowledge of intervention received?                                                                                                    | Not applicable       |
|                                        | <b>Risk of bias judgement</b>                                                                                                                                                                                               | <b>Low risk</b>      |
| Selection of the reported result       | 5.1 Were the data that produced this result analysed in accordance with a pre-specified analysis plan that was finalized before unblinded outcome data were available for analysis?                                         | No info         | Yes                  |
|                                        | Is the numerical result being assessed likely to have been selected, on the basis of the results, from... 5.2 ... multiple eligible outcome measurements (e.g. scales, definitions, time points) within the outcome domain? | Possibly No     | No                   |
|                                        | Is the numerical result being assessed likely to have been selected, on the basis of the results, from... 5.3 ... multiple eligible analyses of the data?                                                                   | Possibly No     | No                   |

|  |                        |         |         |         |         |         |         |         |         |         |         |         |          |
|--|------------------------|---------|---------|---------|---------|---------|---------|---------|---------|---------|---------|---------|----------|
|  | Risk of bias judgement | No info | Low risk |
|--|------------------------|---------|---------|---------|---------|---------|---------|---------|---------|---------|---------|---------|----------|

### Controlled before-after studies and interrupted time series analysis

| Domain                  | Signalling Question                                                                                                                                                                                            | Kusuma <i>et al</i> <sup>37</sup> | de Brauw and Peterman <sup>35</sup> | Diaz and Saldarriaga <sup>41</sup> | Edmond <i>et al</i> <sup>34</sup> | Chakrabarti <i>et al</i> <sup>39</sup> | Powell-Jackson <i>et al</i> <sup>38</sup> | Aizawa <sup>40</sup> | Joshi and Sivaram <sup>32</sup> | Lim <i>et al</i> <sup>42</sup> | Debnath <sup>44</sup> | Powell-Jackson <i>et al</i> <sup>43</sup> | Okoli <i>et al</i> <sup>33</sup> |
|-------------------------|----------------------------------------------------------------------------------------------------------------------------------------------------------------------------------------------------------------|-----------------------------------|-------------------------------------|------------------------------------|-----------------------------------|----------------------------------------|-------------------------------------------|----------------------|---------------------------------|--------------------------------|-----------------------|-------------------------------------------|----------------------------------|
|                         |                                                                                                                                                                                                                | 2016                              | 2020                                | 2019                               | 2019                              | 2021                                   | 2015                                      | 2020                 | 2014                            | 2010                           | 2021                  | 2009                                      | 2014                             |
| Bias due to Confounding | 1.1 Is there potential for confounding of the effect of intervention in this study?                                                                                                                            | No                                | Possibly Yes                        | Possibly No                        | Yes                               | Possibly Yes                           | Yes                                       | Possibly No          | Possibly No                     | Yes                            | Possibly No           | Possibly Yes                              | Yes                              |
|                         | If Y/PY to 1.1: determine whether there is a need to assess time-varying confounding: 1.2. Was the analysis based on splitting participants' follow up time according to intervention received?                | Not applicable                    | No info                             | Not applicable                     | No                                | Possibly Yes                           | Possibly Yes                              | Not applicable       | Not applicable                  | No                             | Not applicable        | No info                                   | Possibly No                      |
|                         | If Y/PY to 1.1: determine whether there is a need to assess time-varying confounding: 1.3. Were intervention discontinuations or switches likely to be related to factors that are prognostic for the outcome? | Not applicable                    | No info                             | Not applicable                     | No                                | Possibly Yes                           | Possibly Yes                              | Not applicable       | Not applicable                  | No                             | Not applicable        | No info                                   | Possibly No                      |
|                         | Questions relating to baseline confounding only: 1.4. Did the authors use an appropriate analysis method that controlled for all the important confounding domains?                                            | Not applicable                    | No info                             | Not applicable                     | No                                | Not applicable                         | Not applicable                            | Not applicable       | Not applicable                  | Yes                            | Not applicable        | No info                                   | Possibly No                      |
|                         | Questions relating to baseline confounding only: 1.5. If Y/PY to 1.4: Were confounding domains that were controlled for measured validly and reliably by the variables available in this study?                | Not applicable                    | No info                             | Not applicable                     | Not applicable                    | Not applicable                         | Not applicable                            | Not applicable       | Not applicable                  | Yes                            | Not applicable        | No info                                   | Possibly No                      |
|                         | Questions relating to baseline confounding only: 1.6. Did the authors control for any post-intervention variables that could                                                                                   | Not applicable                    | No info                             | Not applicable                     | Not applicable                    | Not applicable                         | Not applicable                            | Not applicable       | Not applicable                  | No                             | Not applicable        | No info                                   | Possibly No                      |



|                                                         |                                                                                                                                                                                                               |                 |                 |                 |                     |                      |                      |                 |                 |                      |                 |                 |                     |                 |
|---------------------------------------------------------|---------------------------------------------------------------------------------------------------------------------------------------------------------------------------------------------------------------|-----------------|-----------------|-----------------|---------------------|----------------------|----------------------|-----------------|-----------------|----------------------|-----------------|-----------------|---------------------|-----------------|
|                                                         | have been affected by the intervention?                                                                                                                                                                       |                 |                 |                 |                     |                      |                      |                 |                 |                      |                 |                 |                     |                 |
|                                                         | Questions relating to baseline and time-varying confounding 1.7. Did the authors use an appropriate analysis method that adjusted for all the important confounding domains and for time varying confounding? | Not applicable  | No info         | Not applicable  | Not applicable      | Possibly Yes         | Possibly Yes         | Not applicable  | Not applicable  | Not applicable       | Not applicable  | No info         | Not applicable      |                 |
|                                                         | Questions relating to baseline and time-varying confounding: 1.8. If Y/PY to 1.7: Were confounding domains that were adjusted for measured validly and reliably by the variables available in this study?     | Not applicable  | No info         | Not applicable  | Not applicable      | Possibly No          | Possibly Yes         | Not applicable  | Not applicable  | Not applicable       | Not applicable  | No info         | Not applicable      |                 |
|                                                         | <b>Risk of Bias</b>                                                                                                                                                                                           | <b>Low risk</b> | <b>No info</b>  | <b>Low risk</b> | <b>Serious risk</b> | <b>Moderate risk</b> | <b>Moderate risk</b> | <b>Low risk</b> | <b>Low risk</b> | <b>Moderate risk</b> | <b>Low risk</b> | <b>No info</b>  | <b>Serious risk</b> |                 |
| <b>Bias in selection of participants into the study</b> | 2.1. Was selection of participants into the study (or into the analysis) based on participant characteristics observed after the start of intervention? If N/PN to 2.1: go to 2.4                             | No              | No              | No              | No                  | No                   | No                   | No              | No              | No                   | No              | No              | No                  |                 |
|                                                         | 2.2. If Y/PY to 2.1: Were the postintervention variables that influenced selection likely to be associated with intervention?                                                                                 | Not applicable  | Not applicable  | Not applicable  | Not applicable      | Not applicable       | Not applicable       | Not applicable  | Not applicable  | Not applicable       | Not applicable  | Not applicable  | Not applicable      |                 |
|                                                         | 2.3. If Y/PY to 2.2: Were the postintervention variables that influenced selection likely to be influenced by the outcome or a cause of the outcome?.                                                         | Not applicable  | Not applicable  | Not applicable  | Not applicable      | Not applicable       | Not applicable       | Not applicable  | Not applicable  | Not applicable       | Not applicable  | Not applicable  | Not applicable      |                 |
|                                                         | 2.4. Do start of follow-up and start of intervention coincide for most participants?                                                                                                                          | Possibly Yes    | Possibly Yes    | Possibly Yes    | Possibly Yes        | Possibly Yes         | Possibly Yes         | Possibly Yes    | Possibly Yes    | Possibly Yes         | Possibly Yes    | Possibly Yes    | Possibly Yes        |                 |
|                                                         | 2.5. If Y/PY to 2.2 and 2.3, or N/PN to 2.4: Were adjustment techniques used that are likely to correct for the presence of selection biases?                                                                 | Not applicable  | Not applicable  | Not applicable  | Not applicable      | Not applicable       | Not applicable       | Not applicable  | Not applicable  | Not applicable       | Not applicable  | Not applicable  | Not applicable      | Not applicable  |
|                                                         | <b>Risk of Bias</b>                                                                                                                                                                                           | <b>Low risk</b> | <b>Low risk</b> | <b>Low risk</b> | <b>Low risk</b>     | <b>Low risk</b>      | <b>Low risk</b>      | <b>Low risk</b> | <b>Low risk</b> | <b>Low risk</b>      | <b>Low risk</b> | <b>Low risk</b> | <b>Low risk</b>     | <b>Low risk</b> |

|                                         |                                                                                                                                          |                      |                      |                 |                      |                 |                 |                 |                 |                 |                 |                 |                 |                 |
|-----------------------------------------|------------------------------------------------------------------------------------------------------------------------------------------|----------------------|----------------------|-----------------|----------------------|-----------------|-----------------|-----------------|-----------------|-----------------|-----------------|-----------------|-----------------|-----------------|
| Bias in classification of interventions | 3.1 Were intervention groups clearly defined?                                                                                            | Yes                  | Yes                  | Yes             | Yes                  | Yes             | Yes             | Yes             | Yes             | Yes             | Yes             | Yes             | Yes             |                 |
|                                         | 3.2 Was the information used to define intervention groups recorded at the start of the intervention?                                    | Yes                  | Yes                  | Yes             | Yes                  | Yes             | Yes             | Yes             | Yes             | Yes             | Yes             | Yes             | Yes             |                 |
|                                         | 3.3 Could classification of intervention status have been affected by knowledge of the outcome or risk of the outcome?                   | Possibly No          | Possibly No          | Possibly No     | Possibly No          | Possibly No     | Possibly No     | Possibly No     | Possibly No     | Possibly No     | Possibly No     | Possibly No     | Possibly No     |                 |
|                                         | <b>Risk of Bias</b>                                                                                                                      | <b>Low risk</b>      | <b>Low risk</b>      | <b>Low risk</b> | <b>Low risk</b>      | <b>Low risk</b> | <b>Low risk</b> | <b>Low risk</b> | <b>Low risk</b> | <b>Low risk</b> | <b>Low risk</b> | <b>Low risk</b> | <b>Low risk</b> |                 |
| Deviations from intended interventions  | 4.1. Were there deviations from the intended intervention beyond what would be expected in usual practice?                               | Yes                  | Possibly No          | Possibly No     | Possibly No          | No              | No              | No              | Possibly No     | Possibly No     | Possibly No     | Possibly No     | Possibly No     |                 |
|                                         | 4.2. If Y/PY to 4.1: Were these deviations from intended intervention unbalanced between groups and likely to have affected the outcome? | No                   | Not applicable       | Not applicable  | Not applicable       | Not applicable  | Not applicable  | Not applicable  | Not applicable  | Not applicable  | Not applicable  | Not applicable  | Not applicable  |                 |
|                                         | <b>Risk of Bias</b>                                                                                                                      | <b>Moderate risk</b> | <b>Low risk</b>      | <b>Low risk</b> | <b>Low risk</b>      | <b>Low risk</b> | <b>Low risk</b> | <b>Low risk</b> | <b>Low risk</b> | <b>Low risk</b> | <b>Low risk</b> | <b>Low risk</b> | <b>Low risk</b> |                 |
| Bias due to missing data                | 5.1 Were outcome data available for all, or nearly all, participants?                                                                    | Yes                  | Yes                  | Yes             | No                   | Yes             | Possibly Yes    |                 |
|                                         | 5.2 Were participants excluded due to missing data on intervention status?                                                               | No info              | No                   | Yes             | No                   | No info         | Yes             | No info         | Yes             | No info         | No info         | No info         | No info         |                 |
|                                         | 5.3 Were participants excluded due to missing data on other variables needed for the analysis?                                           | No info              | Yes                  | Yes             | Yes                  | No info         | No              | No info         | Yes             | No info         | No info         | No info         | No info         |                 |
|                                         | 5.4 If PN/N to 5.1, or Y/PY to 5.2 or 5.3: Are the proportion of participants and reasons for missing data similar across interventions? | Yes                  | Yes                  | Yes             | No                   | Yes             | Yes             | Yes             | Yes             | Yes             | Not applicable  | Not applicable  | Not applicable  | Not applicable  |
|                                         | 5.5 If PN/N to 5.1, or Y/PY to 5.2 or 5.3: Is there evidence that results were robust to the presence of missing data?                   | Yes                  | Yes                  | Yes             | Yes                  | Yes             | Yes             | Yes             | Yes             | Yes             | Not applicable  | Not applicable  | Not applicable  | Not applicable  |
|                                         | <b>Risk of Bias</b>                                                                                                                      | <b>Low risk</b>      | <b>Moderate risk</b> | <b>Low risk</b> | <b>Moderate risk</b> | <b>Low risk</b> |

|                                                 |                                                                                                                                                               |                      |                      |                 |                      |                      |                      |                      |                      |                      |                      |                      |                      |
|-------------------------------------------------|---------------------------------------------------------------------------------------------------------------------------------------------------------------|----------------------|----------------------|-----------------|----------------------|----------------------|----------------------|----------------------|----------------------|----------------------|----------------------|----------------------|----------------------|
| <b>Bias in Measurement of Outcomes</b>          | 6.1 Could the outcome measure have been influenced by knowledge of the intervention received?                                                                 | Possibly Yes         | Possibly Yes         | Possibly Yes    | Possibly Yes         | Possibly Yes         | Possibly Yes         | Possibly Yes         | Possibly Yes         | Possibly Yes         | Possibly Yes         | Possibly Yes         | Possibly Yes         |
|                                                 | 6.2 Were outcome assessors aware of the intervention received by study participants?                                                                          | Possibly No          | Possibly No          | Possibly No     | Possibly No          | Possibly No          | Possibly No          | Possibly No          | Possibly No          | Possibly No          | Possibly No          | No                   | No                   |
|                                                 | 6.3 Were the methods of outcome assessment comparable across intervention groups?                                                                             | Yes                  | Yes                  | Yes             | Yes                  | Yes                  | Yes                  | Yes                  | Yes                  | Yes                  | Yes                  | Possibly Yes         | Possibly Yes         |
|                                                 | 6.4 Were any systematic errors in measurement of the outcome related to intervention received?                                                                | No info              | No info              | No              | No info              |
|                                                 | <b>Risk of Bias</b>                                                                                                                                           | <b>Moderate risk</b> | <b>Moderate risk</b> | <b>Low risk</b> | <b>Moderate risk</b> |
| <b>Bias in selection of the reported result</b> | Is the reported effect estimate likely to be selected, on the basis of the results, from... 7.1. ... multiple outcome measurements within the outcome domain? | No info              | No info              | No info         | No info              | No info              | No info              | No info              | No                   | No info              | No info              | No info              | Possibly No          |
|                                                 | 7.2 ... multiple analyses of the intervention outcome relationship                                                                                            | No info              | No info              | No info         | No info              | No info              | No info              | No info              | No                   | No info              | No info              | No info              | Possibly No          |
|                                                 | 7.3 ... different subgroups?                                                                                                                                  | No info              | No info              | No info         | No info              | No info              | No info              | No info              | No                   | No info              | No info              | No info              | Possibly No          |
|                                                 | <b>Risk of Bias</b>                                                                                                                                           | <b>No info</b>       | <b>No info</b>       | <b>No info</b>  | <b>No info</b>       | <b>No info</b>       | <b>No info</b>       | <b>No info</b>       | <b>No info</b>       | <b>Low risk</b>      | <b>No info</b>       | <b>No info</b>       | <b>No info</b>       |
